# Supplementary material for: Future changes in Beijing haze events under different anthropogenic aerosol emission scenarios
Source: Copernicus journal article supplement (doi:10.5194/acp-2020-957), 2020-10-12
Supplement: Supplementary file 1 [file acp-2020-957-supplement.pdf]

**Table S1** Brief introduction to the design of the experiments

| Experiment                                             | GHG forcing        | AA                  | Model       | period    | Realizations |
|--------------------------------------------------------|--------------------|---------------------|-------------|-----------|--------------|
| Historical experiment ( <b>His</b> )                   | CMIP5              | CMIP5               | HadGEM3-GC2 | 1960-2014 | 4            |
|                                                        | historical forcing | historical forcing  | GFDL-CM3    | 1961-2019 | 4            |
| Current legislation emissions ( <b>CLE</b> )           | CMIP5              | globally as ECLIPSE | HadGEM3-GC2 | 2005-2050 | 4            |
|                                                        | RCP4.5             | high range          | GFDL-CM3    | 2010-2050 | 3            |
| Maximum technically feasible reduction ( <b>MTFR</b> ) | CMIP5              | globally as ECLIPSE | HadGEM3-GC2 | 2005-2050 | 4            |
|                                                        | RCP4.5             | low range           | GFDL-CM3    | 2010-2050 | 3            |

**Table S2** Frequency (unit: %) of different bins for each component of HWI in His, CLE and MFR

| Model              | Exp  | deltT    |          |          | U500     |          |          | V850     |          |          |
|--------------------|------|----------|----------|----------|----------|----------|----------|----------|----------|----------|
|                    |      | $\geq 1$ | $\geq 2$ | $\geq 3$ | $\geq 1$ | $\geq 2$ | $\geq 3$ | $\geq 1$ | $\geq 2$ | $\geq 3$ |
| <b>HadGEM3-GC2</b> | His  | 14.0     | 2.0      | 0.0      | 17.0     | 1.7      | 0.0      | 7.2      | 3.0      | 0.3      |
|                    | CLE  | 29.3     | 5.0      | 0.72     | 26.8     | 4.3      | 0.5      | 16.0     | 2.8      | 0.2      |
|                    | MTFR | 37.2     | 8.8      | 1.2      | 36.3     | 11.5     | 1.7      | 22.7     | 6.5      | 0.5      |
| <b>GFDL-CM3</b>    | His  | 16.7     | 1.7      | 0.0      | 18.0     | 3.0      | 0.0      | 17.8     | 2.4      | 0.0      |
|                    | CLE  | 30.2     | 6.0      | 0.0      | 25.1     | 5.1      | 0.0      | 22.2     | 3.2      | 0.6      |
|                    | MTFR | 35.8     | 6.0      | 0.3      | 32.7     | 5.1      | 1.3      | 23.1     | 4.4      | 0.3      |

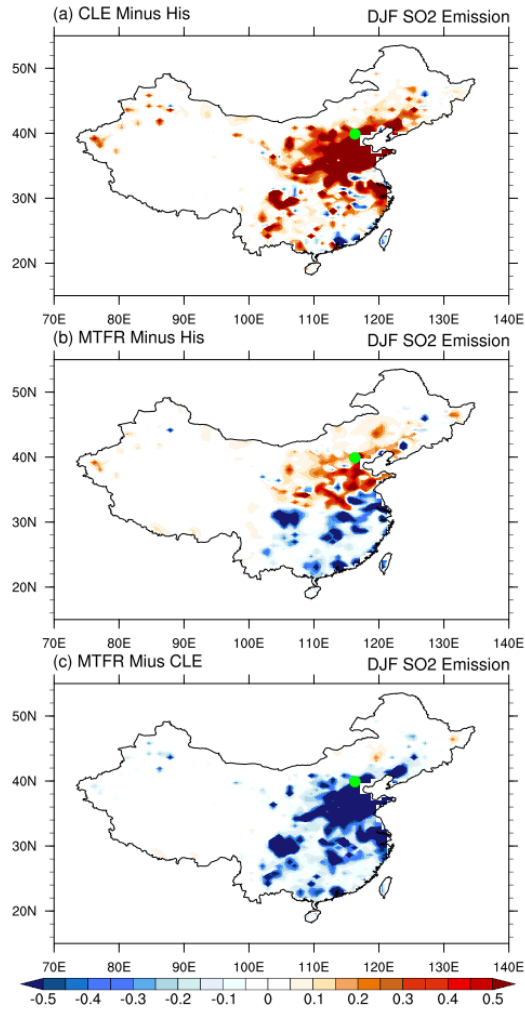

**Fig. S1** Spatial distributions of the winter mean (DJF) sulfur dioxide emissions difference (kg/season) between (a) CLE (2016-2049) and His (1980-2004), (b) MTFR (2016-2049) and His (1980-2004), and (c) MTFR (2016-2049) and CLE (2016-2049). The green dot in each plot indicate the location of Beijing.

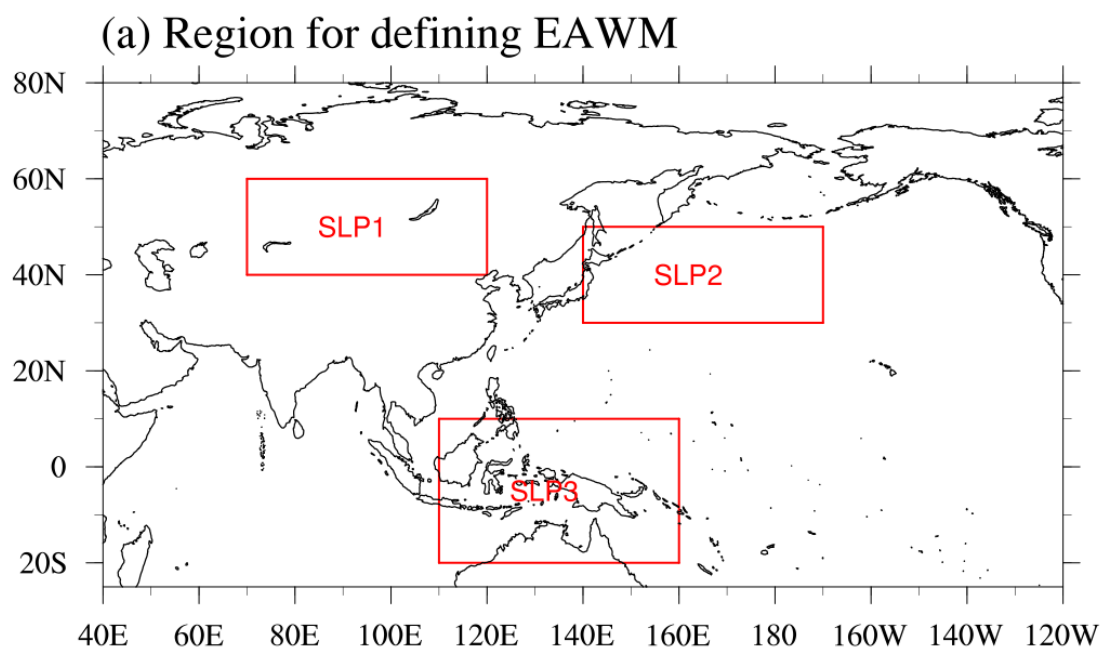

**Fig. S2** Regions used to calculate the EAWM index.

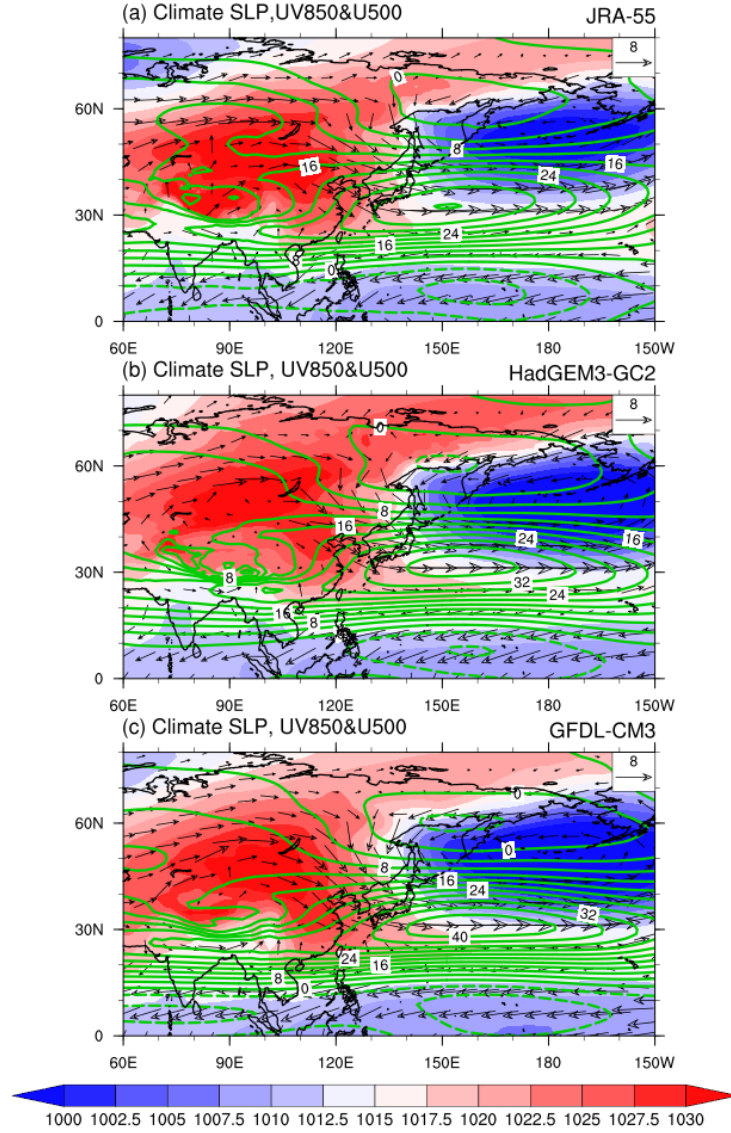

**Fig.S3** DJF mean sea level pressure (shading, hPa), 850hPa winds (vector, m/s) and 500hPa zonal wind (contour, m/s) averaged over 1980-2004 in (a) JRA-55, (b) HadGEM3-GC2, and (c) GFDL-CM3.

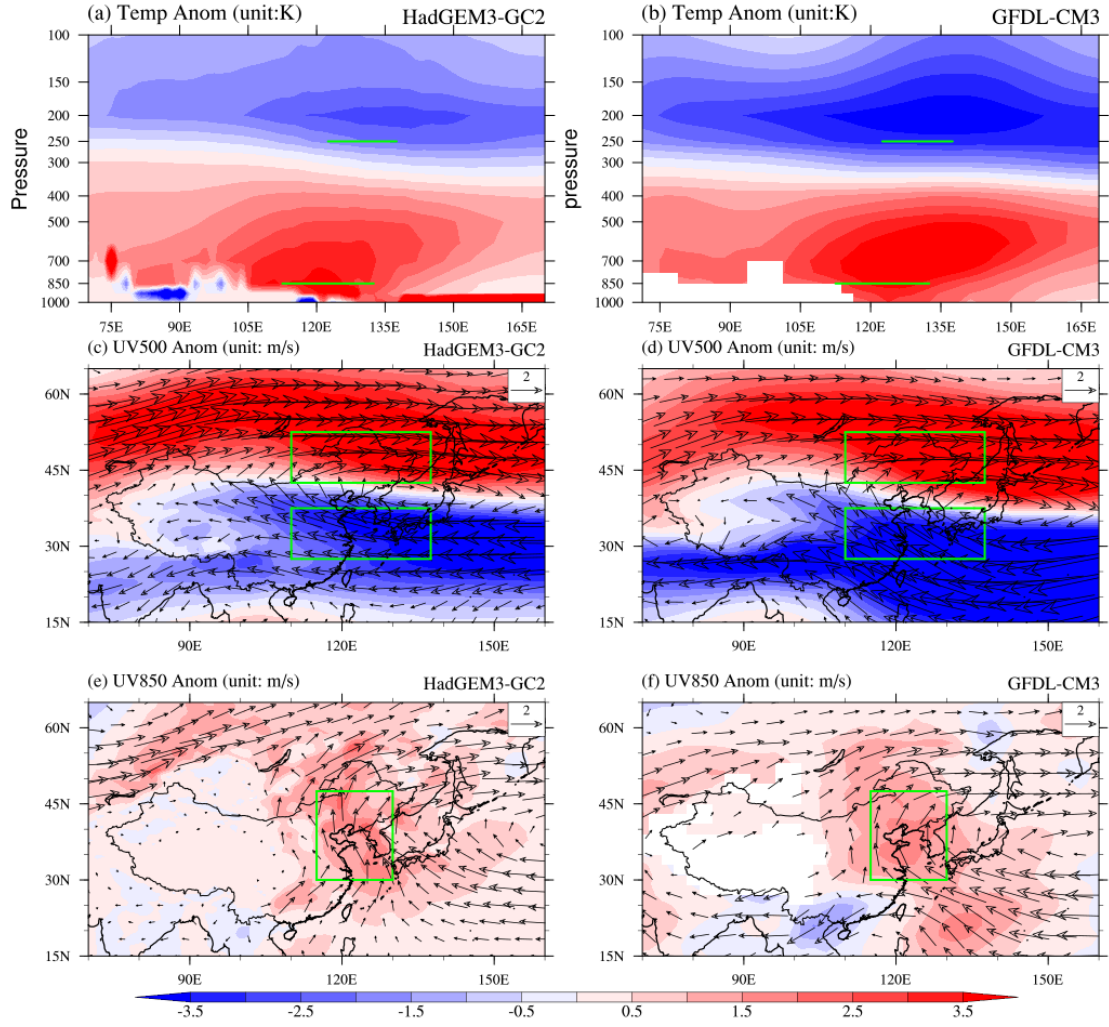

**Fig.S4** Composite circulation anomalies with monthly  $\text{HWI} \geq 1.0$  during 1980-2004 in HadGEM3-GC2 (left) and GFDL-CM3 (right). (a)-(b) temperature anomalies (K) along 40N, (c)-(d) 500hPa winds anomalies (vector, m/s) and 500hPa zonal winds anomalies (shading,  $\text{m s}^{-1}$ ), (e)-(f) 850hPa winds anomalies (vector,  $\text{m s}^{-1}$ ) and 850 hPa meridional winds anomalies (shading,  $\text{m s}^{-1}$ ).

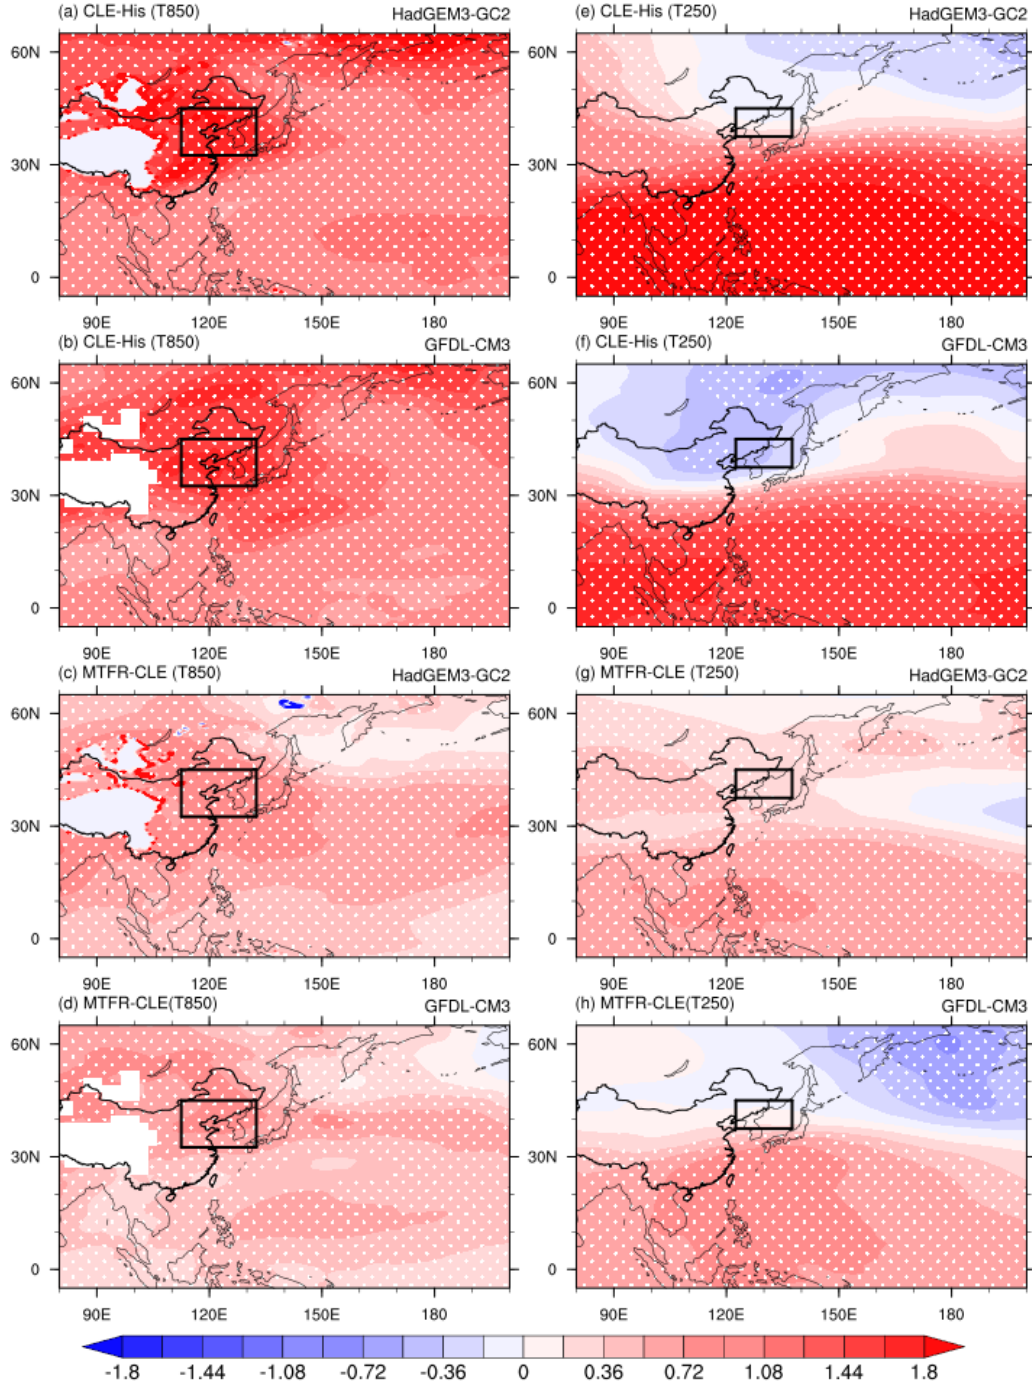

**Fig.S5** Difference in DJF 850hPa temperature (left) and DJF 250hPa temperature (right) between (a)-(d) CLE and His, and between (e)-(h) MTFR and CLE for HadGEM3-GC2 and GFDL-CM3.

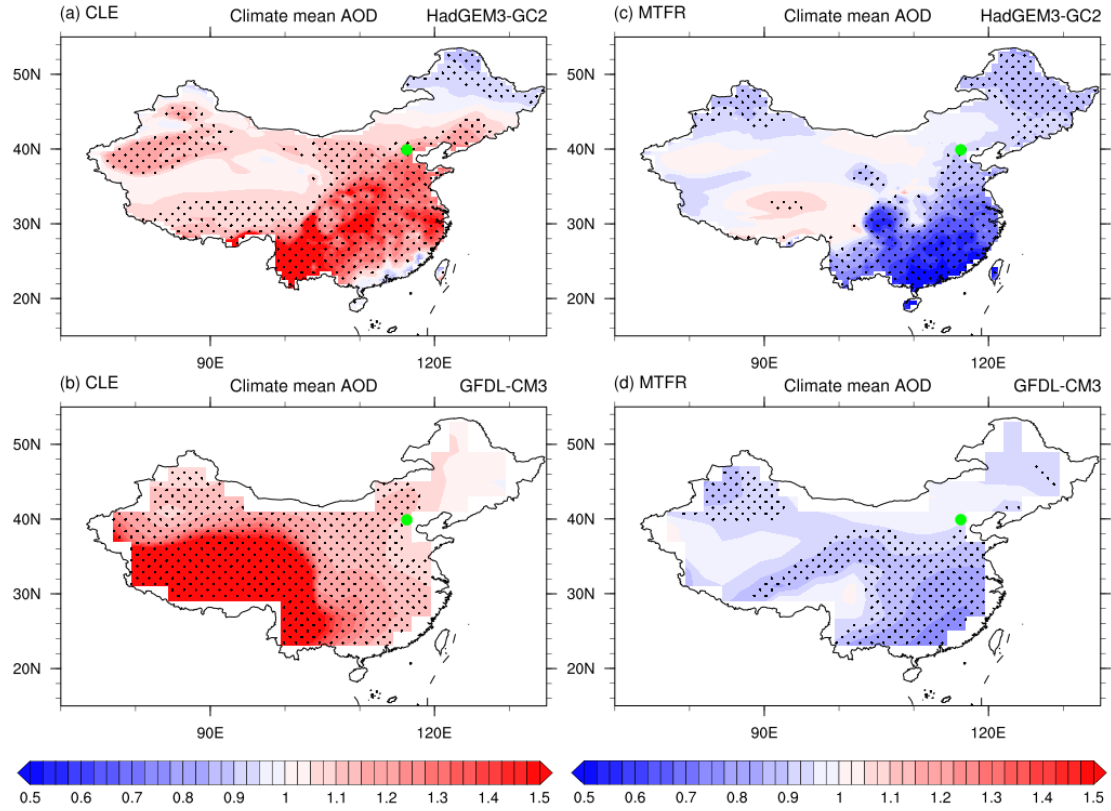

**Fig. S6** Ratio of DJF mean AOD in CLE (left) and MTFR (right) relative to the present climate winter mean in (a)-(b) HadGEM3-GC2 and (c)-(d) GFDL-CM3. Dotted area denotes the difference from present climate mean is statistically significant at the 10% level. Blue and red shadings are lower and higher than present climate mean, respectively.

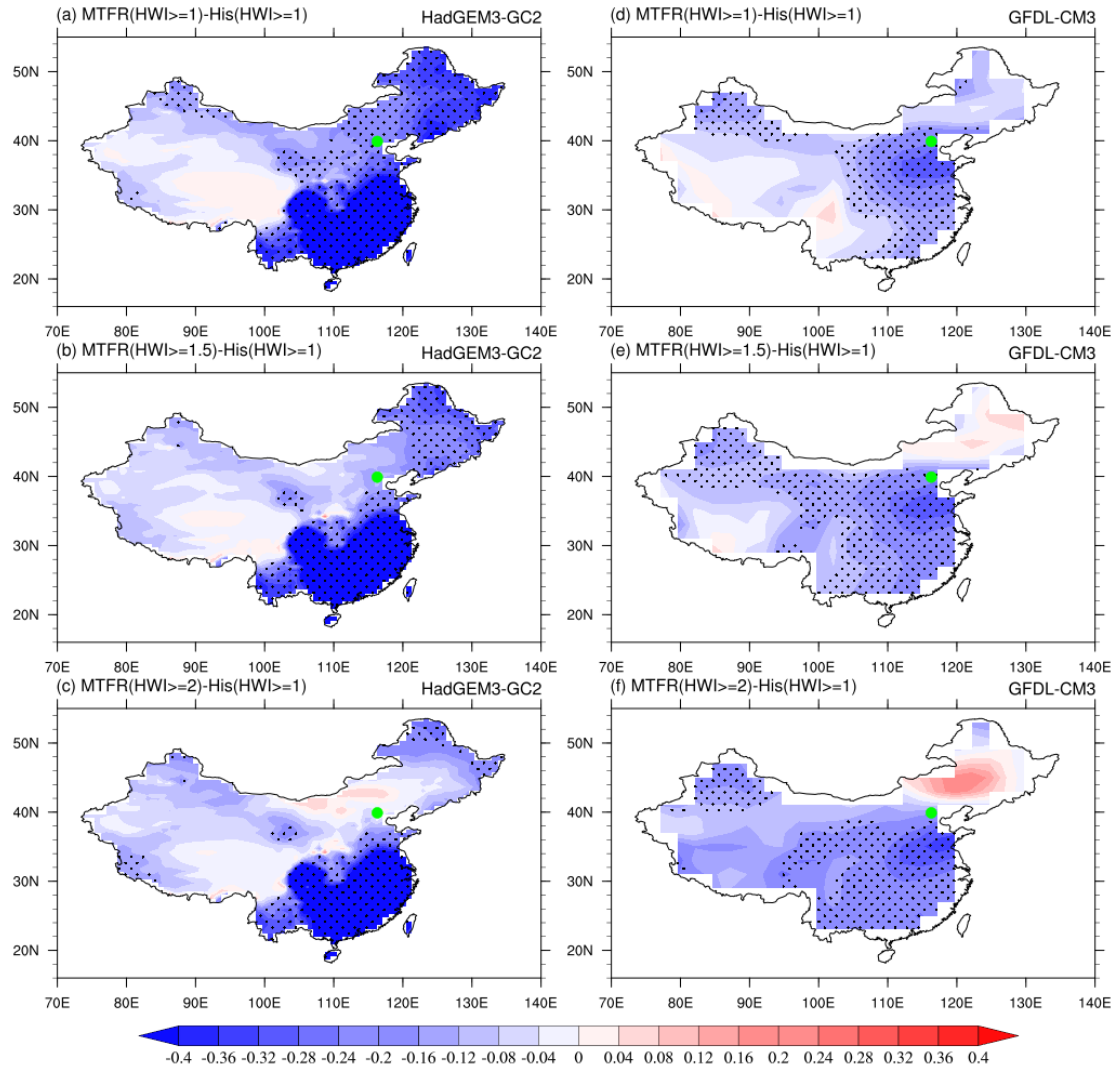

**Fig. S7** Same as Fig.11, but for the difference between AOD when (a)  $\text{HWI} \geq 1$ , (b)  $\text{HWI} \geq 1.5$  and (c)  $\text{HWI} \geq 2$  in MTFR relative to AOD when  $\text{HWI} \geq 1$  in His simulated by HadGEM3-GC2. (d)-(f) are same as (a)-(c), but simulated by GFDL-CM3.
